# Supplementary material for: Half-sandwich complexes of rhodium containing cysteine-derived ligands
Source: Royal Society of Chemistry journal article supplement (doi:10.1039/c6dt02411d), 2016-01-01
Supplement: c6dt02411d1.pdf [file c6dt02411d1.pdf]

66

SS-9 -1836.63639883 a.u. // (+CPCM) -1836.65869332 a.u.

|    |             |             |             |
|----|-------------|-------------|-------------|
| Rh | -0.41509124 | 0.89832258  | 0.16927775  |
| S  | 1.45435183  | -0.31148797 | -1.02631581 |
| N  | -0.83665197 | -1.08015833 | 0.72996181  |
| O  | 0.79419487  | 0.68034898  | 1.86026738  |
| O  | 1.95021812  | -0.89840632 | 2.95971129  |
| O  | -1.43880856 | -3.25627358 | 0.35505782  |
| O  | -2.90762224 | -1.56597033 | -0.11307672 |
| C  | -0.31749594 | 3.10266908  | -0.08336222 |
| C  | -0.75247123 | 2.53771922  | -1.33084233 |
| C  | -1.98927464 | 1.83467466  | -1.11268642 |
| C  | 0.88806142  | 3.95994410  | 0.16162081  |
| H  | 1.64985890  | 3.81870785  | -0.60860472 |
| H  | 1.34254904  | 3.72865023  | 1.12834386  |
| H  | 0.61647822  | 5.02335200  | 0.16502016  |
| C  | -0.06132231 | 2.68799386  | -2.65227741 |
| H  | -0.16742455 | 1.79242875  | -3.26826976 |
| H  | 1.00497611  | 2.89111856  | -2.53148204 |
| H  | -0.49589879 | 3.52836377  | -3.20795762 |
| C  | -2.84157694 | 1.18665710  | -2.15983118 |
| H  | -3.70555860 | 1.81807133  | -2.40470547 |
| H  | -3.20841067 | 0.22229750  | -1.80731603 |
| H  | -2.28201409 | 1.01992763  | -3.08316134 |
| C  | -1.22752276 | 3.18069724  | 2.35221464  |
| H  | -2.07161255 | 2.80104000  | 2.92984243  |
| H  | -1.21396888 | 4.27276845  | 2.44544415  |
| H  | -0.31009394 | 2.78378632  | 2.79900181  |
| C  | -2.34705125 | 2.00399435  | 0.28215204  |
| C  | -1.31609754 | 2.77964506  | 0.91256442  |
| C  | -3.60946110 | 1.51183955  | 0.91566625  |
| H  | -3.77159571 | 0.46160712  | 0.67146231  |
| H  | -4.46526196 | 2.09347985  | 0.54986208  |
| H  | -3.57673618 | 1.60816838  | 2.00231732  |
| C  | 1.11443624  | -0.56194304 | 2.12851869  |
| C  | 0.44328421  | -1.59378840 | 1.20882265  |
| C  | 1.37000730  | -1.84321393 | 0.00009654  |
| H  | 0.93143061  | -2.61360233 | -0.63656387 |
| H  | 2.38486537  | -2.13157369 | 0.28059093  |
| C  | 2.98832989  | 0.55069497  | -0.38227911 |
| H  | 3.06375545  | 1.42413693  | -1.03627036 |
| H  | 2.75572168  | 0.88480977  | 0.62918151  |
| C  | 4.23704029  | -0.28400847 | -0.43421414 |
| C  | 4.95861050  | -0.43052127 | -1.62798653 |
| H  | 4.60602651  | 0.06028158  | -2.53195446 |
| C  | 6.12278085  | -1.19528279 | -1.66289170 |
| H  | 6.67510638  | -1.29709753 | -2.59256417 |
| C  | 6.58012933  | -1.82608793 | -0.50307649 |
| H  | 7.48840551  | -2.42096835 | -0.52978786 |
| C  | 5.86773075  | -1.68784645 | 0.68845387  |
| H  | 6.21806276  | -2.17528765 | 1.59335943  |
| C  | 4.70147752  | -0.92092982 | 0.72692556  |
| H  | 4.14256829  | -0.81920205 | 1.65436548  |
| C  | -1.69105611 | -2.04860556 | 0.32248121  |
| C  | -3.97706226 | -2.52812977 | -0.43447397 |
| C  | -3.58502019 | -3.38011982 | -1.64855923 |
| H  | -3.32011197 | -2.73536885 | -2.49341330 |

|   |             |             |             |
|---|-------------|-------------|-------------|
| H | -4.43352308 | -4.00258173 | -1.95233701 |
| H | -2.73755368 | -4.02222035 | -1.41371402 |
| C | -4.31774227 | -3.38504320 | 0.79241023  |
| H | -3.48631077 | -4.03497021 | 1.05943248  |
| H | -5.19848798 | -3.99915909 | 0.57654516  |
| H | -4.55483112 | -2.74227464 | 1.64656547  |
| H | 0.32164057  | -2.53751279 | 1.74506334  |
| H | -4.97539458 | -1.01238647 | -1.65351968 |
| C | -5.17974772 | -1.64496989 | -0.78531378 |
| H | -5.45944521 | -1.00463740 | 0.05616880  |
| H | -6.03894404 | -2.27757641 | -1.02759601 |

72  
m1 -1952.36964807 a.u. // (+CPCM) -1952.39066312 a.u.

|    |             |             |             |
|----|-------------|-------------|-------------|
| Rh | 0.63622263  | 1.13221461  | -0.41636042 |
| S  | -1.75302514 | -2.54037584 | -0.43928411 |
| N  | 0.99785797  | -0.73050441 | -1.06136811 |
| O  | -0.78192697 | 1.05021650  | -1.85464380 |
| O  | -1.77256522 | -0.27872726 | -3.35048173 |
| O  | 2.37538145  | -2.46648049 | -1.67038597 |
| O  | 2.79062949  | -1.29974951 | 0.24323631  |
| C  | 0.20529946  | 3.23795145  | 0.15970368  |
| C  | 0.10945990  | 2.39340753  | 1.30987127  |
| C  | 1.42862984  | 1.81150151  | 1.56968212  |
| C  | -0.90064084 | 4.02259705  | -0.48358925 |
| H  | -1.78576859 | 4.04980948  | 0.15427608  |
| H  | -1.19109981 | 3.57405927  | -1.43937937 |
| H  | -0.58610389 | 5.05552551  | -0.66532242 |
| C  | -1.09442571 | 2.17028774  | 2.16729818  |
| H  | -1.15577379 | 1.12362599  | 2.48058172  |
| H  | -2.01684492 | 2.42435223  | 1.64187525  |
| H  | -1.03026761 | 2.79596200  | 3.06793178  |
| C  | 1.75736636  | 0.97425420  | 2.76385399  |
| H  | 1.72313853  | 1.59402221  | 3.66953400  |
| H  | 2.75584249  | 0.54750329  | 2.68325487  |
| H  | 1.03604239  | 0.16032207  | 2.88288717  |
| C  | 2.06846699  | 3.81194015  | -1.56727545 |
| H  | 2.83809805  | 3.22443108  | -2.07300283 |
| H  | 2.51783028  | 4.77054300  | -1.27578677 |
| H  | 1.27250360  | 4.01791731  | -2.28579611 |
| C  | 2.30670310  | 2.25314200  | 0.54768179  |
| C  | 1.53590782  | 3.10335428  | -0.36183279 |
| C  | 3.77052544  | 1.96541813  | 0.43248375  |
| H  | 3.97547257  | 0.91667340  | 0.64746293  |
| H  | 4.33975506  | 2.58472458  | 1.13695181  |
| H  | 4.14088936  | 2.18107320  | -0.57208642 |
| C  | -0.90139247 | -0.07878751 | -2.51197626 |
| C  | 0.11570610  | -1.16668807 | -2.15830845 |
| C  | -0.61265399 | -2.50004923 | -1.88515365 |
| H  | 0.12660173  | -3.28078523 | -1.70750679 |
| H  | -1.18773549 | -2.76345845 | -2.77532411 |
| C  | -3.40475531 | -2.09105444 | -1.18850916 |
| H  | -3.19434841 | -1.65041482 | -2.16333822 |
| H  | -3.95534023 | -3.02554163 | -1.32348465 |
| C  | -4.17957992 | -1.13292944 | -0.32250189 |
| C  | -4.13066237 | 0.24697609  | -0.57073994 |
| H  | -3.53238109 | 0.61683852  | -1.39858782 |
| C  | -4.85193008 | 1.13370581  | 0.22937741  |

|   |             |             |             |
|---|-------------|-------------|-------------|
| H | -4.82003675 | 2.19847442  | 0.01384231  |
| C | -5.62519988 | 0.65913215  | 1.29171212  |
| H | -6.18876518 | 1.35159769  | 1.91060842  |
| C | -5.68077328 | -0.71225320 | 1.54490586  |
| H | -6.28899141 | -1.09205182 | 2.36114055  |
| C | -4.96559780 | -1.60060361 | 0.73967199  |
| H | -5.02380278 | -2.66956965 | 0.93106397  |
| C | 2.08362256  | -1.56260177 | -0.89145561 |
| C | 3.86638644  | -2.23294314 | 0.64263967  |
| C | 3.30980835  | -3.65236516 | 0.81732441  |
| H | 2.45026511  | -3.63876149 | 1.49489198  |
| H | 4.08101398  | -4.29011262 | 1.26152184  |
| H | 3.00502139  | -4.08125669 | -0.13563693 |
| C | 5.01914217  | -2.17872192 | -0.36656120 |
| H | 4.70546006  | -2.55953209 | -1.33758268 |
| H | 5.85594762  | -2.78286169 | -0.00049044 |
| H | 5.37402775  | -1.14968867 | -0.48613311 |
| H | 0.72124411  | -1.34989962 | -3.05683471 |
| H | 3.49447807  | -1.69211186 | 2.71543013  |
| C | 4.32374794  | -1.70087570 | 2.00350016  |
| H | 4.73175276  | -0.68908398 | 1.92380740  |
| H | 5.11196753  | -2.34609103 | 2.40248697  |
| O | -0.85669537 | -1.13288073 | 2.51048479  |
| H | -1.03532925 | -1.33699488 | 1.57458773  |
| C | -1.72339897 | -1.93062999 | 3.30464038  |
| H | -2.78254446 | -1.73129567 | 3.09313159  |
| H | -1.53851845 | -3.00511863 | 3.16775174  |
| H | -1.52748032 | -1.68095533 | 4.35127894  |

72  
 ts12 -1952.36800025 a.u. // (+CPCM) -1952.38993563 a.u.

|    |             |             |             |
|----|-------------|-------------|-------------|
| Rh | -1.49950587 | -0.87233338 | -0.22915313 |
| S  | 2.60788050  | 0.65359798  | 1.09816738  |
| N  | -0.24385228 | 0.66373154  | -0.59573294 |
| O  | 0.11156096  | -1.93876275 | -0.82411006 |
| O  | 2.20049211  | -1.80682989 | -1.59649309 |
| O  | 0.05308705  | 2.73996763  | -1.55166875 |
| O  | -1.55366079 | 2.42167389  | 0.03550285  |
| C  | -2.92771041 | -2.57402652 | -0.35125794 |
| C  | -2.98434363 | -2.04049327 | 0.96301097  |
| C  | -3.43416215 | -0.64689827 | 0.88139564  |
| C  | -2.49081599 | -3.94899240 | -0.76152161 |
| H  | -2.32713106 | -4.58880277 | 0.10730827  |
| H  | -1.55213540 | -3.90564565 | -1.32330858 |
| H  | -3.25112683 | -4.42400262 | -1.39085640 |
| C  | -2.70759832 | -2.76181123 | 2.24276131  |
| H  | -2.23146534 | -2.09501259 | 2.96224499  |
| H  | -2.05091405 | -3.61977209 | 2.08750009  |
| H  | -3.64680568 | -3.12742942 | 2.67822283  |
| C  | -3.66415107 | 0.22313397  | 2.07617749  |
| H  | -2.80289389 | 0.18096904  | 2.74855138  |
| H  | -4.54779374 | -0.11629388 | 2.63149343  |
| H  | -3.81841854 | 1.26245522  | 1.78983291  |
| C  | -3.36580847 | -1.64323469 | -2.75390597 |
| H  | -3.19278299 | -0.69097978 | -3.25987941 |
| H  | -4.36972319 | -1.99192506 | -3.03097445 |
| H  | -2.64255900 | -2.36814529 | -3.13357099 |
| C  | -3.64973719 | -0.33382468 | -0.48487903 |

|   |             |             |             |
|---|-------------|-------------|-------------|
| C | -3.26141040 | -1.50446159 | -1.26778244 |
| C | -4.22992707 | 0.91939499  | -1.05720996 |
| H | -4.08017048 | 1.76581378  | -0.39017842 |
| H | -5.30737936 | 0.79149618  | -1.22275741 |
| H | -3.77386445 | 1.16991805  | -2.01802444 |
| C | 1.16205904  | -1.26660954 | -1.23525122 |
| C | 1.01002603  | 0.25920639  | -1.25728302 |
| C | 2.26740377  | 0.94174500  | -0.68601516 |
| H | 2.17483027  | 2.02014958  | -0.80765433 |
| H | 3.13800435  | 0.60585916  | -1.25299462 |
| C | 3.81007092  | -0.76814454 | 1.06445173  |
| H | 3.93949868  | -1.00321118 | 2.12522405  |
| H | 3.32898365  | -1.61368213 | 0.57289014  |
| C | 5.13221856  | -0.45024927 | 0.41629578  |
| C | 5.39996876  | -0.88798017 | -0.88869511 |
| H | 4.63808450  | -1.44826981 | -1.42325033 |
| C | 6.62673524  | -0.60079051 | -1.49270454 |
| H | 6.82110850  | -0.94647286 | -2.50418499 |
| C | 7.59868435  | 0.12245193  | -0.80232015 |
| H | 8.55349241  | 0.34226895  | -1.27154932 |
| C | 7.33899713  | 0.56276465  | 0.49865649  |
| H | 8.09236661  | 1.12485555  | 1.04359704  |
| C | 6.11507153  | 0.27995320  | 1.10057015  |
| H | 5.91432248  | 0.62961301  | 2.11030449  |
| C | -0.54362245 | 1.99578833  | -0.77803467 |
| C | -1.78424284 | 3.87095545  | 0.19466529  |
| C | -0.50612281 | 4.56083571  | 0.68982490  |
| H | -0.13641753 | 4.06885646  | 1.59497966  |
| H | -0.72881090 | 5.60375185  | 0.93738980  |
| H | 0.27445573  | 4.54090957  | -0.06940384 |
| C | -2.30240479 | 4.48715025  | -1.11027496 |
| H | -1.54281814 | 4.44156799  | -1.88949749 |
| H | -2.57504670 | 5.53377795  | -0.93805933 |
| H | -3.19737404 | 3.95967688  | -1.45555067 |
| H | 0.97508011  | 0.55804466  | -2.31632403 |
| H | -2.51993006 | 3.43775626  | 2.19398181  |
| C | -2.85704215 | 3.94388216  | 1.28529865  |
| H | -3.79555387 | 3.48747004  | 0.95638722  |
| H | -3.06552264 | 4.98962498  | 1.52969367  |
| O | -0.16161558 | -0.69615544 | 2.59676511  |
| H | 0.40204627  | -0.13371750 | 2.03382136  |
| C | 0.66922139  | -1.73598607 | 3.09605194  |
| H | 1.07088832  | -2.36683240 | 2.29235358  |
| H | 1.50769156  | -1.34444863 | 3.68818766  |
| H | 0.05737455  | -2.36058081 | 3.75328181  |

72  
m2 -1952.37065640 a.u. // (+CPCM) -1952.39558193 a.u.

|    |             |             |             |
|----|-------------|-------------|-------------|
| Rh | -1.20060088 | -0.95990655 | -0.01500068 |
| S  | 2.64156953  | 1.34874990  | -0.55464589 |
| N  | -0.54926195 | 0.85636765  | -0.85637610 |
| O  | 0.23921198  | -1.64917050 | -1.34558823 |
| O  | 1.53453946  | -1.10449025 | -3.07585892 |
| O  | -1.02558928 | 2.97577139  | -1.61421083 |
| O  | -1.76009961 | 2.27628554  | 0.43630126  |
| C  | -2.38721133 | -2.83592519 | -0.13813591 |
| C  | -2.32167088 | -2.47039998 | 1.23052052  |
| C  | -2.95437454 | -1.16173084 | 1.38582145  |

|   |             |             |             |
|---|-------------|-------------|-------------|
| C | -1.88509500 | -4.09647020 | -0.76723583 |
| H | -1.26717662 | -4.67409743 | -0.07785386 |
| H | -1.29079464 | -3.87804492 | -1.65814979 |
| H | -2.73129587 | -4.72358501 | -1.07083294 |
| C | -1.78556106 | -3.29956309 | 2.35538365  |
| H | -1.34567402 | -2.67881014 | 3.13897398  |
| H | -1.03118693 | -4.01081842 | 2.01425911  |
| H | -2.60187029 | -3.87170493 | 2.81313479  |
| C | -3.18534465 | -0.47673562 | 2.69585149  |
| H | -4.07995836 | -0.88480830 | 3.18222506  |
| H | -3.33059757 | 0.59520922  | 2.56538994  |
| H | -2.34473804 | -0.62432657 | 3.37811699  |
| C | -3.37201542 | -1.75539880 | -2.31883824 |
| H | -3.45765488 | -0.74395976 | -2.72145503 |
| H | -4.33717419 | -2.25673640 | -2.46279228 |
| H | -2.62571837 | -2.29558184 | -2.90534714 |
| C | -3.43487814 | -0.75196687 | 0.10858944  |
| C | -3.01243614 | -1.73846095 | -0.86559120 |
| C | -4.28822995 | 0.43562630  | -0.19304976 |
| H | -4.18592298 | 1.20876080  | 0.56545513  |
| H | -5.33802226 | 0.11817246  | -0.22402209 |
| H | -4.04676886 | 0.87242503  | -1.16415017 |
| C | 0.73633958  | -0.79153793 | -2.18702240 |
| C | 0.29792466  | 0.67386002  | -2.03610740 |
| C | 1.55075185  | 1.57425057  | -2.02792891 |
| H | 1.24139895  | 2.61797329  | -2.03247334 |
| H | 2.14604334  | 1.37087414  | -2.92008742 |
| C | 4.03410027  | 0.34302236  | -1.27289346 |
| H | 3.61183590  | -0.57017477 | -1.69370491 |
| H | 4.46396605  | 0.93699763  | -2.08386626 |
| C | 5.06458184  | 0.05078546  | -0.21412307 |
| C | 5.10767207  | -1.20007406 | 0.41733974  |
| H | 4.39645086  | -1.96907272 | 0.12847130  |
| C | 6.06111773  | -1.47018726 | 1.40127138  |
| H | 6.08436116  | -2.44670161 | 1.87602307  |
| C | 6.98431459  | -0.48948874 | 1.76974005  |
| H | 7.72741016  | -0.69873673 | 2.53347143  |
| C | 6.95104633  | 0.76086326  | 1.14660910  |
| H | 7.66953579  | 1.52671449  | 1.42371162  |
| C | 5.99824714  | 1.02779042  | 0.16314081  |
| H | 5.97893031  | 2.00043109  | -0.32155403 |
| C | -1.11177480 | 2.08573625  | -0.75640465 |
| C | -2.11156279 | 3.63917546  | 0.87415915  |
| C | -0.84981258 | 4.50843269  | 0.94903994  |
| H | -0.10064095 | 4.03641665  | 1.59300580  |
| H | -1.10071309 | 5.48284263  | 1.37971390  |
| H | -0.42092178 | 4.66320023  | -0.04076419 |
| C | -3.18213273 | 4.25904967  | -0.03259357 |
| H | -2.79262421 | 4.43383644  | -1.03440329 |
| H | -3.51248607 | 5.21182224  | 0.39416505  |
| H | -4.05428037 | 3.60193203  | -0.10189789 |
| H | -0.24862975 | 0.93642284  | -2.95622307 |
| H | -1.94706977 | 2.91261516  | 2.91839698  |
| C | -2.67449769 | 3.42498210  | 2.28221983  |
| H | -3.59485350 | 2.83450464  | 2.25574627  |
| H | -2.91063145 | 4.39098762  | 2.73781106  |
| O | 0.58634785  | -0.51761305 | 1.35924409  |

|      |                                                    |             |             |
|------|----------------------------------------------------|-------------|-------------|
| H    | 1.07897713                                         | 0.11362751  | 0.78959237  |
| C    | 1.47548374                                         | -1.60140681 | 1.68289223  |
| H    | 1.70732554                                         | -2.19446638 | 0.79383123  |
| H    | 2.39962596                                         | -1.20803989 | 2.11606940  |
| H    | 0.97312859                                         | -2.22651187 | 2.42098559  |
| 72   |                                                    |             |             |
| ts23 | -1952.36695368 a.u. // (+CPCM) -1952.39121737 a.u. |             |             |
| Rh   | -1.69707829                                        | -0.70130982 | 0.19322133  |
| S    | 2.67279716                                         | -0.54938134 | -0.74248658 |
| N    | -0.32764898                                        | 0.36122324  | -0.96613192 |
| O    | -0.78485233                                        | -2.24026120 | -0.79875702 |
| O    | 0.32189474                                         | -2.75809220 | -2.66888891 |
| O    | 0.19926475                                         | 2.27456202  | -2.12897714 |
| O    | -0.67543387                                        | 2.39432224  | -0.01747047 |
| C    | -3.60421355                                        | -1.83993063 | 0.35376194  |
| C    | -3.34342371                                        | -1.26346968 | 1.62237066  |
| C    | -3.33804405                                        | 0.19289994  | 1.47400228  |
| C    | -3.68271853                                        | -3.29419840 | 0.00452805  |
| H    | -3.61772499                                        | -3.92567018 | 0.89264856  |
| H    | -2.86070144                                        | -3.56628483 | -0.66647697 |
| H    | -4.62999461                                        | -3.51580781 | -0.49918425 |
| C    | -3.16467558                                        | -1.98467867 | 2.92400179  |
| H    | -2.39207985                                        | -1.51164930 | 3.53581883  |
| H    | -2.88309081                                        | -3.02841631 | 2.77169047  |
| H    | -4.09648466                                        | -1.96901430 | 3.50349896  |
| C    | -3.18672758                                        | 1.15916563  | 2.60732159  |
| H    | -4.12321965                                        | 1.24055934  | 3.17417207  |
| H    | -2.91829338                                        | 2.15300982  | 2.24993977  |
| H    | -2.40629308                                        | 0.83530191  | 3.30095347  |
| C    | -4.03142015                                        | -0.92469652 | -2.06622803 |
| H    | -3.67382107                                        | -0.08307037 | -2.66351402 |
| H    | -5.11950916                                        | -0.98990850 | -2.19720145 |
| H    | -3.58943987                                        | -1.83735005 | -2.47250949 |
| C    | -3.60423193                                        | 0.49705584  | 0.11207646  |
| C    | -3.68200104                                        | -0.75706342 | -0.61848514 |
| C    | -3.81490635                                        | 1.85168125  | -0.48481800 |
| H    | -3.31431320                                        | 2.62603318  | 0.09394397  |
| H    | -4.88858291                                        | 2.07775596  | -0.51551519 |
| H    | -3.43521801                                        | 1.90368039  | -1.50747904 |
| C    | -0.08468992                                        | -1.92918727 | -1.87050640 |
| C    | 0.21478882                                         | -0.43016778 | -2.07417640 |
| C    | 1.72968680                                         | -0.25221742 | -2.29687473 |
| H    | 1.93240368                                         | 0.76103389  | -2.64333946 |
| H    | 2.03641555                                         | -0.98843215 | -3.04402651 |
| C    | 4.38155697                                         | -0.20718422 | -1.35497633 |
| H    | 4.59922555                                         | -0.91233378 | -2.16263289 |
| H    | 4.39983723                                         | 0.80625993  | -1.76694299 |
| C    | 5.37961274                                         | -0.35013737 | -0.23471841 |
| C    | 5.95648066                                         | -1.59437149 | 0.05280600  |
| H    | 5.68322464                                         | -2.45911817 | -0.54614591 |
| C    | 6.87390695                                         | -1.73006127 | 1.09456195  |
| H    | 7.31612889                                         | -2.70053982 | 1.30088044  |
| C    | 7.22564291                                         | -0.62180169 | 1.86720468  |
| H    | 7.94295252                                         | -0.72580151 | 2.67616135  |
| C    | 6.65351621                                         | 0.62148970  | 1.59241381  |
| H    | 6.92377640                                         | 1.48915971  | 2.18753866  |
| C    | 5.73582518                                         | 0.75427092  | 0.55039299  |

|   |             |             |             |
|---|-------------|-------------|-------------|
| H | 5.29122194  | 1.72340159  | 0.33916765  |
| C | -0.24629854 | 1.70846773  | -1.12985419 |
| C | -0.30255326 | 3.80630403  | 0.14544778  |
| C | 1.22409804  | 3.95652480  | 0.10798140  |
| H | 1.68805880  | 3.29788584  | 0.84898440  |
| H | 1.49913608  | 4.98879529  | 0.34818266  |
| H | 1.61440752  | 3.70909391  | -0.87886594 |
| C | -0.98711516 | 4.68832149  | -0.90705200 |
| H | -0.62601260 | 4.44865191  | -1.90601028 |
| H | -0.78167827 | 5.74270734  | -0.69241453 |
| H | -2.07244127 | 4.54681625  | -0.88029555 |
| H | -0.25275427 | -0.13805073 | -3.02696142 |
| H | -0.40204455 | 3.47013455  | 2.29147949  |
| C | -0.82315096 | 4.14904490  | 1.54469838  |
| H | -1.91468813 | 4.08093003  | 1.58729135  |
| H | -0.54264396 | 5.17329240  | 1.80829404  |
| O | 0.09149067  | -0.65461616 | 1.60343317  |
| H | 0.67957959  | -0.18614422 | 0.97789663  |
| C | 0.70191935  | -1.90547376 | 1.97673945  |
| H | 0.80741135  | -2.56270968 | 1.11144101  |
| H | 1.67811103  | -1.71755381 | 2.43299679  |
| H | 0.04235250  | -2.36700426 | 2.71384980  |

72  
m3 -1952.36773350 a.u. // (+CPCM) -1952.39451859 a.u.

|    |             |             |             |
|----|-------------|-------------|-------------|
| Rh | -1.57233191 | -0.63994720 | 0.13124104  |
| S  | 2.57461488  | -1.15815193 | -1.52796569 |
| N  | -0.29003813 | 0.42607585  | -1.15747262 |
| O  | -1.12865676 | -2.11254495 | -1.26510573 |
| O  | -0.28712976 | -2.49953041 | -3.29350008 |
| O  | 0.35874562  | 2.35865554  | -2.21985733 |
| O  | -0.20090470 | 2.38034300  | -0.00176626 |
| C  | -3.55010885 | -1.53571986 | 0.60938221  |
| C  | -2.95527577 | -1.15361434 | 1.83847988  |
| C  | -2.74568330 | 0.29273676  | 1.81772022  |
| C  | -3.96304375 | -2.90899845 | 0.18470416  |
| H  | -3.60335484 | -3.67207331 | 0.87685948  |
| H  | -3.57610794 | -3.14033612 | -0.81108361 |
| H  | -5.05649252 | -2.97407824 | 0.14653195  |
| C  | -2.65932026 | -2.04137123 | 3.00648756  |
| H  | -1.76627022 | -1.71461457 | 3.54386055  |
| H  | -2.51907707 | -3.08047601 | 2.70349244  |
| H  | -3.49584474 | -2.00936661 | 3.71531667  |
| C  | -2.24647282 | 1.09595052  | 2.97729259  |
| H  | -3.06231237 | 1.27959883  | 3.68732888  |
| H  | -1.85429114 | 2.06032432  | 2.65650852  |
| H  | -1.45455462 | 0.57049124  | 3.51667141  |
| C  | -4.34233742 | -0.28269354 | -1.55513075 |
| H  | -4.00641312 | 0.57919697  | -2.13526787 |
| H  | -5.42867985 | -0.19840585 | -1.42719259 |
| H  | -4.14465138 | -1.18568415 | -2.13683618 |
| C  | -3.24809120 | 0.79038200  | 0.58053104  |
| C  | -3.67009000 | -0.34229600 | -0.21880477 |
| C  | -3.39709916 | 2.22039541  | 0.17791737  |
| H  | -2.72086461 | 2.86799846  | 0.73152069  |
| H  | -4.42653387 | 2.54054861  | 0.38169284  |
| H  | -3.21234469 | 2.36205762  | -0.88877773 |
| C  | -0.50251787 | -1.74219573 | -2.34405289 |

|   |             |             |             |
|---|-------------|-------------|-------------|
| C | 0.00440111  | -0.29075646 | -2.39738873 |
| C | 1.50201479  | -0.31796151 | -2.77645341 |
| H | 1.86837701  | 0.69948011  | -2.90563816 |
| H | 1.60509222  | -0.86434795 | -3.71505409 |
| C | 3.67360168  | 0.23348183  | -0.97375809 |
| H | 4.23985049  | 0.57729440  | -1.84223268 |
| H | 3.03492490  | 1.04704045  | -0.62507938 |
| C | 4.59449893  | -0.24586612 | 0.11814392  |
| C | 5.88212189  | -0.70895096 | -0.18557826 |
| H | 6.22061583  | -0.70848986 | -1.21836976 |
| C | 6.73284501  | -1.16146741 | 0.82459214  |
| H | 7.72975457  | -1.51152736 | 0.57347993  |
| C | 6.30437226  | -1.16088636 | 2.15377294  |
| H | 6.96623451  | -1.51042949 | 2.94052040  |
| C | 5.02132486  | -0.70492843 | 2.46740404  |
| H | 4.68260884  | -0.69791083 | 3.49922201  |
| C | 4.17285777  | -0.25207273 | 1.45634799  |
| H | 3.17517978  | 0.10050147  | 1.70493200  |
| C | -0.03256577 | 1.75529661  | -1.20996636 |
| C | 0.29534372  | 3.75502115  | 0.19503557  |
| C | 1.80846906  | 3.81215043  | -0.04982007 |
| H | 2.32603435  | 3.09837184  | 0.59960288  |
| H | 2.18080450  | 4.81332446  | 0.18886048  |
| H | 2.04634587  | 3.58937959  | -1.08967873 |
| C | -0.46516467 | 4.75423225  | -0.68575944 |
| H | -0.25043840 | 4.58923051  | -1.74044193 |
| H | -0.16979107 | 5.77353546  | -0.41615774 |
| H | -1.54370570 | 4.66386192  | -0.52586408 |
| H | -0.49832171 | 0.18664063  | -3.25303230 |
| H | 0.47386007  | 3.27446886  | 2.30955104  |
| C | 0.00577166  | 4.03107444  | 1.67336480  |
| H | -1.06937920 | 4.04209993  | 1.87330700  |
| H | 0.40617567  | 5.01014703  | 1.95182624  |
| O | 0.46103011  | -1.18568378 | 1.05381653  |
| H | 1.03799862  | -0.98671881 | 0.28217448  |
| C | 0.70436129  | -2.55323526 | 1.42990685  |
| H | 0.40706890  | -3.23741335 | 0.63037103  |
| H | 1.76486071  | -2.68881568 | 1.66205338  |
| H | 0.11505165  | -2.75553806 | 2.32401484  |

72  
ts34 -1952.36487456 a.u. // (+CPCM) -1952.38827750 a.u.

|    |             |             |             |
|----|-------------|-------------|-------------|
| Rh | 1.65291152  | -0.48869115 | 0.02571284  |
| S  | -2.51702761 | -1.10864222 | 1.75615252  |
| N  | 0.32289187  | 0.55117149  | 1.16564229  |
| O  | 1.54721964  | -1.76767717 | 1.58967147  |
| O  | 0.48714876  | -2.20332180 | 3.50769145  |
| O  | -0.32656757 | 2.52729256  | 2.15144196  |
| O  | 0.06295916  | 2.44451381  | -0.09424616 |
| C  | 3.42880420  | -1.47332435 | -0.88865337 |
| C  | 2.47557891  | -1.25413882 | -1.92004534 |
| C  | 2.23540506  | 0.18370471  | -2.04009418 |
| C  | 3.95442545  | -2.78343625 | -0.38314907 |
| H  | 3.56835367  | -3.62104242 | -0.96664434 |
| H  | 3.65711686  | -2.93885143 | 0.65895634  |
| H  | 5.04819540  | -2.80907848 | -0.44007335 |
| C  | 1.82803480  | -2.27939628 | -2.79489989 |
| H  | 0.74144859  | -2.16649952 | -2.77987011 |



|   |             |             |             |
|---|-------------|-------------|-------------|
| H | 2.06595903  | -3.29365287 | -2.47158070 |
| H | 2.17480160  | -2.16171257 | -3.82904422 |
| C | 1.36818278  | 0.81037648  | -3.08595485 |
| H | 1.92061429  | 0.92143900  | -4.02832961 |
| H | 1.02154183  | 1.79470458  | -2.77508058 |
| H | 0.48914599  | 0.19361403  | -3.28819512 |
| C | 4.73930503  | 0.04997397  | 0.78118501  |
| H | 4.52985734  | 0.97149566  | 1.32837588  |
| H | 5.74901174  | 0.13265912  | 0.35758855  |
| H | 4.73962350  | -0.77604796 | 1.49541306  |
| C | 3.04704212  | 0.84369391  | -1.08107952 |
| C | 3.73996990  | -0.18411826 | -0.30767947 |
| C | 3.24160703  | 2.31613814  | -0.91894276 |
| H | 2.34193476  | 2.86366059  | -1.19285149 |
| H | 4.06676244  | 2.65592640  | -1.55813447 |
| H | 3.49149565  | 2.57697769  | 0.11195461  |
| C | 0.72226681  | -1.45976608 | 2.56860064  |
| C | 0.07477350  | -0.07028339 | 2.47828362  |
| C | -1.40863082 | -0.16399066 | 2.88196951  |
| H | -1.82762592 | 0.83295149  | 3.02182009  |
| H | -1.44403604 | -0.70468034 | 3.83020030  |
| C | -3.11610399 | 0.21754721  | 0.60301158  |
| H | -3.48763500 | 1.04422919  | 1.21415273  |
| H | -2.26447671 | 0.57276293  | 0.01850184  |
| C | -4.20686146 | -0.31838053 | -0.28999068 |
| C | -5.54956304 | -0.00867673 | -0.03855354 |
| H | -5.80183649 | 0.62017426  | 0.81146202  |
| C | -6.56172158 | -0.49466550 | -0.86660071 |
| H | -7.59728653 | -0.24031125 | -0.65946476 |
| C | -6.24376353 | -1.30573736 | -1.95657150 |
| H | -7.03024575 | -1.68505577 | -2.60266060 |
| C | -4.90926442 | -1.62874525 | -2.21037447 |
| H | -4.65491196 | -2.26369267 | -3.05448310 |
| C | -3.89715943 | -1.13956957 | -1.38482980 |
| H | -2.86158363 | -1.40938596 | -1.57633661 |
| C | 0.01435158  | 1.88937984  | 1.15692911  |
| C | -0.44182415 | 3.81962512  | -0.28773157 |
| C | -1.91711000 | 3.91814735  | 0.12364914  |
| H | -2.51359771 | 3.17641807  | -0.41642210 |
| H | -2.29909779 | 4.91072713  | -0.13630198 |
| H | -2.03875143 | 3.76520066  | 1.19484232  |
| C | 0.42935558  | 4.83173873  | 0.46668722  |
| H | 0.34607620  | 4.69006083  | 1.54326757  |
| H | 0.10926100  | 5.84832217  | 0.21492257  |
| H | 1.47956390  | 4.72962159  | 0.17561440  |
| H | 0.54353665  | 0.53997286  | 3.26532844  |
| H | -0.88848158 | 3.27538888  | -2.34548392 |
| C | -0.32544108 | 4.03751603  | -1.79941261 |
| H | 0.71640953  | 4.01175936  | -2.13232320 |
| H | -0.73235856 | 5.01813807  | -2.06304400 |
| O | -0.62520894 | -2.23592581 | -0.69422172 |
| H | -1.10163451 | -1.82108358 | 0.05406143  |
| C | -0.47238263 | -3.61396918 | -0.34797073 |
| H | 0.20692211  | -3.73801134 | 0.50261153  |
| H | -1.43825038 | -4.07577555 | -0.10863858 |
| H | -0.05470972 | -4.12705831 | -1.21851178 |

m4 -1952.36658269 a.u. // (+CPCM) -1952.39031751 a.u.

|    |             |             |             |
|----|-------------|-------------|-------------|
| Rh | 1.24781054  | -0.93745088 | -0.00559385 |
| S  | -2.48445396 | 0.12133805  | 1.89049728  |
| N  | 0.85370989  | 0.57558387  | 1.25947537  |
| O  | 0.74570271  | -2.03716539 | 1.60169258  |
| O  | -0.17062532 | -1.95691039 | 3.63780306  |
| O  | 1.16411890  | 2.61529809  | 2.26504342  |
| O  | 1.61685203  | 2.36716156  | 0.04441244  |
| C  | 1.48209426  | -2.65929577 | -1.38635849 |
| C  | 0.67772906  | -1.64179113 | -2.00735417 |
| C  | 1.49126313  | -0.44838215 | -2.19066858 |
| C  | 1.00537813  | -4.03406868 | -1.02989168 |
| H  | -0.01914646 | -3.99343508 | -0.65165891 |
| H  | 1.62879183  | -4.48416317 | -0.25564826 |
| H  | 1.02992116  | -4.68739586 | -1.91071993 |
| C  | -0.72880568 | -1.81602191 | -2.48118268 |
| H  | -1.30173225 | -2.44880620 | -1.79909430 |
| H  | -0.72501804 | -2.28940627 | -3.47262223 |
| H  | -1.24313754 | -0.85712291 | -2.57579750 |
| C  | 1.06104993  | 0.76793235  | -2.94740756 |
| H  | 1.00196953  | 0.54041922  | -4.01928773 |
| H  | 1.76366800  | 1.58717137  | -2.81195511 |
| H  | 0.07484285  | 1.11517738  | -2.62918004 |
| C  | 3.91278050  | -2.76067517 | -0.43829994 |
| H  | 4.50502253  | -2.06307282 | 0.15845158  |
| H  | 4.57485095  | -3.19826241 | -1.19663424 |
| H  | 3.57727642  | -3.56328583 | 0.22071543  |
| C  | 2.76320522  | -0.70402412 | -1.61666095 |
| C  | 2.75460708  | -2.07647182 | -1.09389803 |
| C  | 3.93293885  | 0.22883738  | -1.59113598 |
| H  | 3.61348202  | 1.23703452  | -1.32311452 |
| H  | 4.41636899  | 0.26687534  | -2.57543063 |
| H  | 4.68340932  | -0.09127887 | -0.86563860 |
| C  | 0.28281522  | -1.39476434 | 2.65320914  |
| C  | 0.32281014  | 0.13301984  | 2.56276813  |
| C  | -1.06995218 | 0.69305669  | 2.91516001  |
| H  | -1.05016953 | 1.78367065  | 2.92494871  |
| H  | -1.30932200 | 0.33618416  | 3.91962039  |
| C  | -2.41094797 | 1.27147721  | 0.44153430  |
| H  | -2.32537726 | 2.29160779  | 0.82658057  |
| H  | -1.50177291 | 1.04910589  | -0.12386210 |
| C  | -3.64462657 | 1.14231891  | -0.42215489 |
| C  | -4.40613952 | 2.27836575  | -0.72532007 |
| H  | -4.11647340 | 3.24074270  | -0.31087923 |
| C  | -5.52791519 | 2.19138348  | -1.55080052 |
| H  | -6.10347266 | 3.08526508  | -1.77405645 |
| C  | -5.91221419 | 0.95928526  | -2.07967330 |
| H  | -6.78746574 | 0.88726792  | -2.71881663 |
| C  | -5.16836266 | -0.18196549 | -1.77410593 |
| H  | -5.46644908 | -1.14801870 | -2.17166660 |
| C  | -4.04343185 | -0.09482182 | -0.95356858 |
| H  | -3.49156001 | -0.99866090 | -0.70941195 |
| C  | 1.21187169  | 1.90392962  | 1.26461290  |
| C  | 1.96950740  | 3.79895577  | -0.08048818 |
| C  | 0.76915622  | 4.68588720  | 0.27761051  |
| H  | -0.10753489 | 4.38626400  | -0.30607368 |
| H  | 1.00040396  | 5.72632009  | 0.02692849  |

|   |             |             |             |
|---|-------------|-------------|-------------|
| H | 0.52966508  | 4.62245128  | 1.33732836  |
| C | 3.20539717  | 4.11688870  | 0.76977592  |
| H | 2.98971797  | 4.00627005  | 1.83137157  |
| H | 3.52736292  | 5.14572521  | 0.57783797  |
| H | 4.03204114  | 3.44994642  | 0.50324471  |
| H | 0.98887325  | 0.48972131  | 3.35935175  |
| H | 1.43075768  | 3.73687203  | -2.18935677 |
| C | 2.29692172  | 3.97304799  | -1.56581045 |
| H | 3.13599642  | 3.34021033  | -1.86912991 |
| H | 2.57859047  | 5.01249266  | -1.75752238 |
| O | -2.15306927 | -2.92258377 | 0.29233641  |
| H | -1.96682935 | -2.09171319 | 0.76296691  |
| C | -2.51508341 | -3.88072822 | 1.28617691  |
| H | -1.76132458 | -3.94016447 | 2.07942202  |
| H | -3.48867076 | -3.64923238 | 1.73934430  |
| H | -2.58984819 | -4.85263674 | 0.79017375  |

66  
 RS-9 -1836.63174326 a.u. // (+CPCM) -1836.65608420 a.u.

|    |             |             |             |
|----|-------------|-------------|-------------|
| Rh | 1.34275800  | -0.57330758 | 0.09224435  |
| S  | -0.79749351 | -1.84964150 | 0.23679362  |
| N  | 0.15361893  | 0.71463528  | 1.26735394  |
| O  | 1.71976302  | -1.33956698 | 1.99144774  |
| O  | 0.99817280  | -1.19335196 | 4.11216294  |
| O  | -1.71436127 | 2.00204741  | 1.60713956  |
| O  | -0.22339656 | 2.54761489  | -0.04276289 |
| C  | 3.02705404  | -1.60227274 | -0.91891880 |
| C  | 2.08672073  | -1.22943748 | -1.93382154 |
| C  | 1.94230899  | 0.20584097  | -1.92567870 |
| C  | 3.49953901  | -2.98148263 | -0.57091172 |
| H  | 2.81583618  | -3.74748307 | -0.94353336 |
| H  | 3.57547334  | -3.10075821 | 0.51298703  |
| H  | 4.48853918  | -3.17687165 | -1.00460353 |
| C  | 1.41048841  | -2.17580505 | -2.87946804 |
| H  | 0.46655097  | -1.77325569 | -3.25352876 |
| H  | 1.20941420  | -3.14209031 | -2.41142296 |
| H  | 2.05474368  | -2.35766753 | -3.74887404 |
| C  | 1.15368196  | 1.03391355  | -2.89351277 |
| H  | 1.80561761  | 1.46064011  | -3.66688089 |
| H  | 0.65543159  | 1.85426298  | -2.37586853 |
| H  | 0.38865913  | 0.44122763  | -3.40109098 |
| C  | 4.51182308  | -0.34823132 | 0.81114894  |
| H  | 4.72212063  | 0.67226033  | 1.13525429  |
| H  | 5.45526302  | -0.80672947 | 0.49335968  |
| H  | 4.12834783  | -0.90522840 | 1.67288527  |
| C  | 2.84972709  | 0.72669882  | -0.92380740 |
| C  | 3.51278085  | -0.38290741 | -0.30239164 |
| C  | 3.07864959  | 2.17763807  | -0.64006132 |
| H  | 2.12690176  | 2.69127207  | -0.49951161 |
| H  | 3.60982113  | 2.64661952  | -1.47803268 |
| H  | 3.67781659  | 2.31970498  | 0.26085052  |
| C  | 0.89573565  | -0.92359050 | 2.92589278  |
| C  | -0.29844098 | -0.13543646 | 2.36756045  |
| C  | -1.34336167 | -1.16090116 | 1.86275173  |
| H  | -2.31231301 | -0.68523530 | 1.71081323  |
| H  | -1.45897003 | -2.00161919 | 2.55011859  |
| C  | -1.91361766 | -0.95315678 | -0.96263197 |
| H  | -1.67408222 | 0.10786346  | -0.89427460 |

|   |             |             |             |
|---|-------------|-------------|-------------|
| H | -1.57939778 | -1.32330286 | -1.93575110 |
| C | -3.37962959 | -1.21258402 | -0.75092999 |
| C | -4.17068797 | -0.26689428 | -0.08225676 |
| H | -3.71361432 | 0.64715601  | 0.28881456  |
| C | -5.53326200 | -0.49959485 | 0.11426622  |
| H | -6.13480921 | 0.24042704  | 0.63352404  |
| C | -6.11894151 | -1.67545654 | -0.35464148 |
| H | -7.17925360 | -1.85472267 | -0.20325336 |
| C | -5.33727861 | -2.62270747 | -1.02116865 |
| H | -5.78876878 | -3.53899673 | -1.39002921 |
| C | -3.97718815 | -2.39272488 | -1.21676197 |
| H | -3.37213010 | -3.13259966 | -1.73495880 |
| C | -0.66737722 | 1.75310313  | 0.99678525  |
| C | -0.86363819 | 3.85694808  | -0.26160712 |
| C | -2.32214989 | 3.68862038  | -0.70747243 |
| H | -2.38093610 | 3.00494241  | -1.56129859 |
| H | -2.72334185 | 4.65692611  | -1.02559983 |
| H | -2.93480538 | 3.29895410  | 0.10347468  |
| C | -0.74157182 | 4.72413313  | 0.99808963  |
| H | -1.30779388 | 4.29441758  | 1.82346391  |
| H | -1.12250347 | 5.72969942  | 0.79111485  |
| H | 0.30822535  | 4.81396135  | 1.29544976  |
| H | -0.75548025 | 0.45139836  | 3.16656052  |
| H | -0.11926940 | 3.88911861  | -2.31444981 |
| C | -0.04862084 | 4.48282009  | -1.39848494 |
| H | 1.00543574  | 4.58033573  | -1.12442380 |
| H | -0.43415812 | 5.48288824  | -1.61816126 |

6

methanol -115.723964215 a.u. // (+CPCM) -115.728728805 a.u.

|   |             |             |             |
|---|-------------|-------------|-------------|
| C | 0.66191089  | -0.01948326 | 0.00000107  |
| H | 1.08177341  | 0.98959104  | -0.00039748 |
| H | 1.03810540  | -0.54251391 | 0.89228621  |
| H | 1.03804443  | -0.54318540 | -0.89191321 |
| O | -0.74941723 | 0.12201963  | 0.00000151  |
| H | -1.13405077 | -0.76314921 | 0.00000598  |
